# Supplementary material for: Facile preparation of porous polybenzimidazole networks and adsorption behavior of CO2gas, organic and water vapors
Source: Royal Society of Chemistry journal article supplement (doi:10.1039/c2py20908j), 2012-11-29
Supplement: c2py20908j.pdf [file c2py20908j.pdf]

## Supporting Information

# Facile preparation of porous polybenzimidazole networks and adsorption behaviors of CO<sub>2</sub> gas, organic and water vapors

Hao Yu , Mengzhe Tian, Changjiang Shen and Zhonggang Wang\*

*State Key Laboratory of Fine Chemicals, Department of Polymer Science and Materials, School of Chemical Engineering, Dalian University of Technology, Dalian 116024, China*

Email: zgwang@dlut.edu.cn

### Contents

**Fig. 1S** FTIR spectra of TCA and TCS.

**Fig. 2S** <sup>1</sup>H NMR spectrum of TCA.

**Fig. 3S** <sup>1</sup>H NMR spectrum of TCS.

**Fig. 4S** FTIR spectra of PBI-1 and PBI-2.

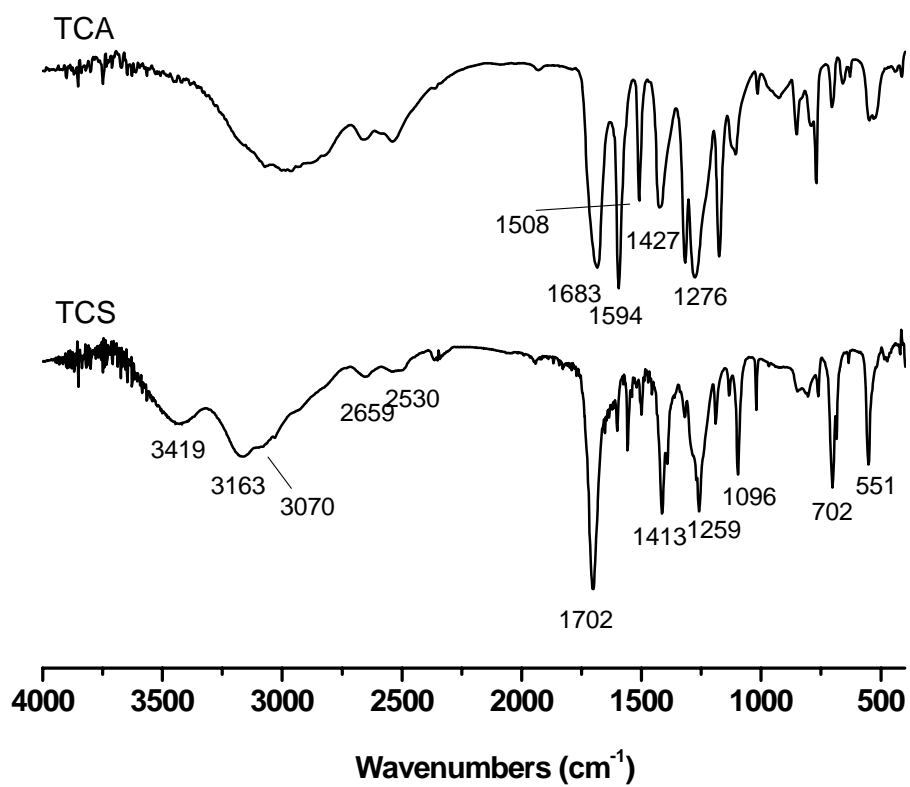

**Fig. 1S** FTIR spectra of TCA and TCS.

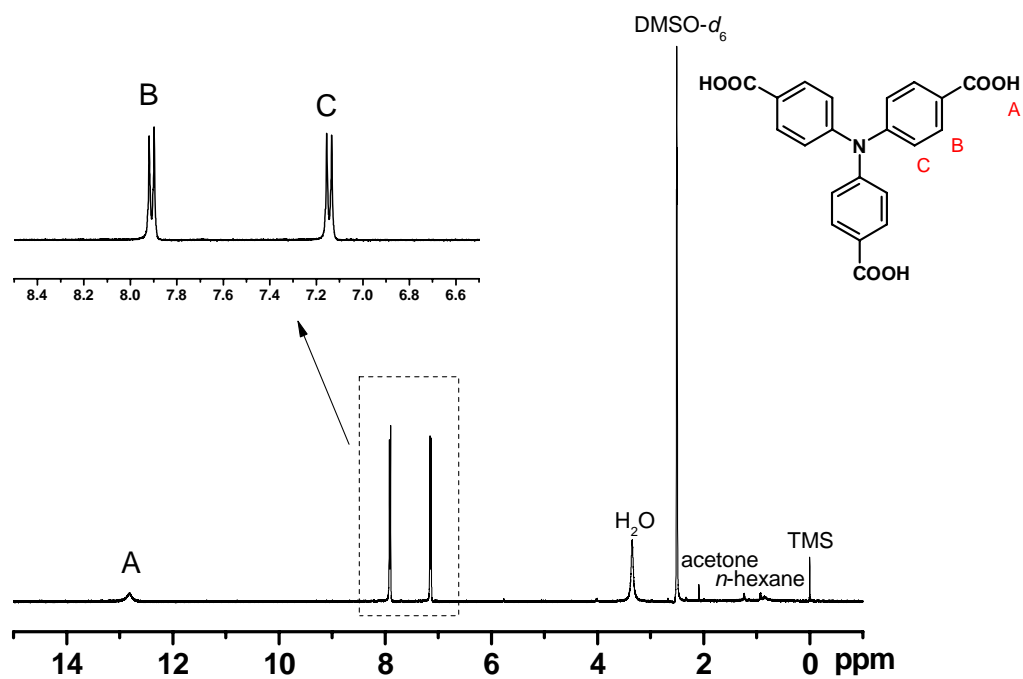

Fig. 2S  $^1\text{H}$  NMR spectrum of TCA.

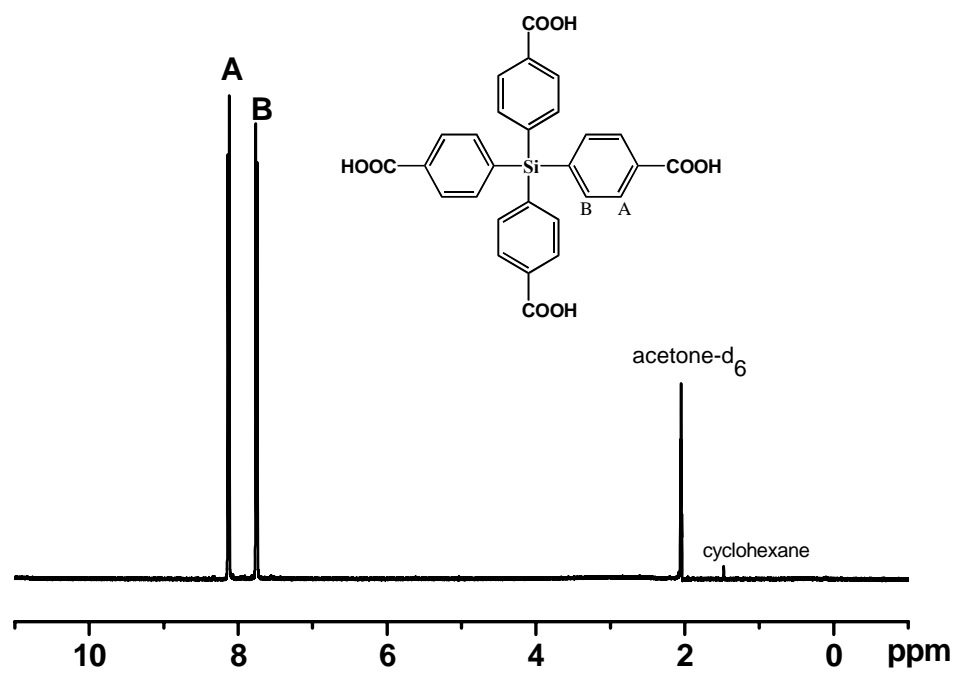

Fig. 3S  $^1\text{H}$  NMR spectrum of TCS.

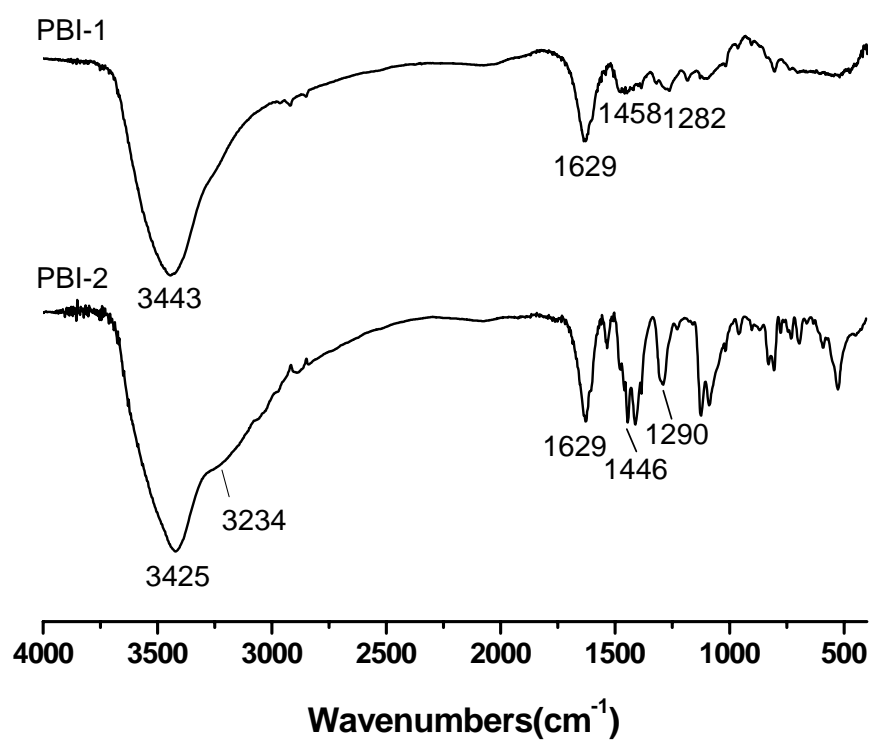

**Fig. 4S** FTIR spectra of **PBI-1** and **PBI-2**.
